## 1 **CiliaMiner: an integrated database for Ciliopathy Genes and Ciliopathies**

2

3 Merve Gül Turan<sup>1,2 †</sup>, Mehmet Emin Orhan<sup>2 †</sup>, Sebiha Cevik<sup>1</sup>, Oktay I. Kaplan<sup>1\*</sup>

4

5 <sup>1</sup> Rare Disease Laboratory, School of Life and Natural Sciences, Abdullah Gul University, Kayseri,  
6 Turkey

7 <sup>2</sup> Department of Bioengineering, School of Life and Natural Sciences, Abdullah Gul University,  
8 Kayseri, Turkey

9

10 † These authors equally contributed to this work

11 \*co-corresponding authors: [oktay.kaplan@agu.edu.tr](mailto:oktay.kaplan@agu.edu.tr)

12

13

14

15

16

17

18

19

20

21

22

23

24

25

26

27

28

29

30

31

32 **Abstract**

33

34 Cilia are found in eukaryotic species ranging from single-celled organisms, such as  
35 *Chlamydomonas reinhardtii*, to humans, but not in plants. The ability to respond to repellents  
36 and/or attractants, regulate cell proliferation and differentiation, and provide cellular mobility are  
37 just a few examples of how crucial cilia are to cells and organisms. Over 30 distinct rare disorders  
38 generally known as ciliopathy are caused by abnormalities or functional impairments in cilia and  
39 cilia-related compartments. Because of the complexity of ciliopathies and the rising number of  
40 ciliopathies and ciliopathy genes, a ciliopathy-oriented and up-to-date database is required. In  
41 addition, disorders not yet known as ciliopathy but have genes that produce cilia localizing proteins  
42 have yet to be classified. Here we present CiliaMiner, a manually curated ciliopathy database that  
43 includes ciliopathy lists collected from articles and databases. Analysis reveals that there are 55  
44 distinct disorders likely related to ciliopathy, with over 4000 clinical manifestations. Based on  
45 comparative symptom analysis and subcellular localization data, diseases are classified as primary,  
46 secondary, or atypical ciliopathies. CiliaMiner provides easy access to all of these diseases and  
47 disease genes, as well as clinical features and gene-specific clinical features, as well as subcellular  
48 localization of each protein. Additionally, the orthologs of disease genes are also provided for  
49 mice, zebrafish, Xenopus, Drosophila, and *C. elegans*. CiliaMiner  
50 (<https://kaplanlab.shinyapps.io/ciliaminer>) aims to serve the cilia community with its  
51 comprehensive content, and highly enriched interactive heatmaps, and will be continually updated.

52

53

54

55

56

57

58

59

60

61

62

## 63 Introduction

64

65 Cilia are cellular organelles that extend out of the cell in unicellular and multi-organismal  
66 organisms. Within the cilia structure, nine pairs of peripheral microtubules are radially positioned  
67 and encircled by the cilia membrane, and this microtubule-based core structure is called the  
68 axoneme. Despite cilia being tiny cellular organelles, cilia have several subcompartments,  
69 including the transition zone (TZ), the basal body (a modified centriole), the axoneme, and the  
70 distal segment (1). Importantly, the ciliary structures and subcompartments have been well-  
71 preserved throughout evolution. Furthermore, depending on their structural differences and  
72 functional distinctions, cilia are categorized as either motile (9+2 axonemal structures) or non-  
73 motile (9+0 axonemal structure; primary cilium) (**Figure 1**) (2). In humans, motile cilia exist as  
74 multiple cilia on cell surfaces, requiring cell motility and fluid movement, whereas a single non-  
75 motile cilium emerges from a cell surface and is primarily involved in sensation (chemosensation  
76 and photosensation), developmental and signaling pathway regulation (Wnt, Hedgehog) (3,4). Any  
77 structural or functional anomalies in primary or motile cilia can cause a variety of rare disorders,  
78 and the term "ciliopathy" can be used to describe the complete spectrum of diseases that are related  
79 to primary or motile cilia (5).

80

81 The number of ciliopathies and ciliopathy-related genes has expanded dramatically over the last  
82 20 years, owing to advances in medical technology, the ease of disseminating clinical knowledge,  
83 and the ability to sequence people (6). Apart from the growing number of ciliopathies and disease-  
84 associated genes, compiling, categorizing, and displaying the numerous ciliopathies and their  
85 associated genes has become more difficult due to symptomatic differences between ciliopathies,  
86 changes in symptom frequency, and the same gene causing multiple types of ciliopathies. Even  
87 though all the relevant details and information about diseases and disease genes are available, they  
88 are scattered among different biological and medical databases, necessitating users to visit these  
89 databases like MalaCards (7) and OMIM (8). It is critical to keep all of this massive data up to date  
90 and in one place, allowing the ciliopathy community to access all of the most recent data.

91

92 Here we present a ciliopathy-specific database, called CiliaMiner, that compiles and presents the  
93 updated list of ciliopathies, ciliopathy-associated genes, and the disease symptoms for each

94 condition. Furthermore, CiliaMiner provides classifications of ciliopathies and associated  
95 disorders based on the subcellular localization of disease-associated genes in conjunction with  
96 disease symptoms. CiliaMiner offers easy access to all ciliopathies, disease symptoms, ciliopathy  
97 genes, ciliopathy candidate genes, and orthologs of ciliopathy genes and ciliopathy candidate  
98 genes, seeking to serve as a major place in the ciliopathy database. Each piece of information is  
99 manually acquired and confirmed before being uploaded to the appropriate part of the CiliaMiner  
100 database, and users can also easily submit their data to CiliaMiner.

101

## 102 **Materials and Methods**

103

### 104 **Data collection and curation**

105 Data presented in the CiliaMiner were manually collected from six separate data sources, including  
106 Online Mendelian Inheritance in Man (OMIM) (8), PubMed, Congruent clinical Variation  
107 Visualization Tool (ConVarT) (9), OrthoList 2 (OL2) (10), Wormbase (11), and Protein Atlas (12)  
108 databases. We specifically utilized the phrase "ciliopathy" in PubMed to find a comprehensive list  
109 of ciliopathy disorders, followed by confirmation of ciliopathy disease using an OMIM search.  
110 The manual search, together with OMIM validation, yielded 55 possible ciliopathy diseases. Once  
111 the list of ciliopathy diseases is finalized, we collected the clinical symptoms and features of each  
112 disease using OMIM and PubMed web pages. The disease-associated genes and relevant  
113 references were collected from OMIM and PubMed. Additionally, we looked for potential  
114 ciliopathy genes in PubMed using the phrase "cilia" between 2018-2022, and if the protein product  
115 of the gene localizes to cilia, we next searched for disease relevance and collected symptoms for  
116 that disease. Finally, we visited PubMed for each gene to determine whether the protein encoded  
117 by a ciliopathy gene is detected in cilia or cilia-related compartments such as the basal body and  
118 transition zone. Finally, we obtained the localization from ProteinAtlas (12), an excellent source  
119 for protein localization, for those for which we were unable to find it.

120

### 121 **Orthologs of Disease-Associated Genes**

122 The ciliopathy disease list was created using human genes. Following that, the ortholog genes of  
123 other organisms, *Mus musculus*, *Danio rerio*, *Xenopus laevis*, *Drosophila*  
124 *melanogaster*, and *Caenorhabditis elegans*, are created using ConVarT (9) and OrthoList 2 (10)

125 (just for *C. elegans*). Wormbase used to be certain of the common gene name, sequence number,  
126 and WormBase ID of *C. elegans*. We created a dedicated webpage for orthology search, called  
127 "Ciliopathy Genes and Orthologs".

128

## 129 **Collection of Detailed Clinical Symptoms of Diseases**

130

131 Following the collection of the list of ciliary diseases, 4092 distinct clinical features are discovered  
132 for disorders connected to ciliopathy (OMIM and the articles). A meticulous collection of clinical  
133 symptoms suggests that there are 2354 and 1784 unique symptoms for primary ciliopathy and  
134 secondary disease groups, respectively. Because the list of clinical features is extensive, we choose  
135 the limited numbers of clinical symptoms to generate representative heatmaps on the "Ciliopathy  
136 Names" page in the CiliaMiner. However, all ciliopathy clinical features are available on the  
137 "Symptoms and Diseases" page. These symptoms are assigned to organ symbols and presented on  
138 the same disease symptom summary panels on the "Ciliopathy Names" page.

139

## 140 **Classification of diseases**

141

142 All disease searches combined with symptoms and subcellular localization data yield a list of 55  
143 different diseases and over 4000 clinical symptoms. The ciliopathy disorders exhibit a variety of  
144 diverse symptoms that vary between ciliopathies as well as among the same ciliopathies (**Table**  
145 **1**). For example, many clinical features, including finger abnormalities like polydactyly,  
146 brachydactyly, and syndactyly, situs inversus, cerebral and skeletal anomalies are manifested in  
147 the most common ciliopathies, including Bardet-Biedl Syndrome (BBS) (13), Meckel-Gruber  
148 Syndrome (MKS) (14), Nephronophthisis (NPHP) (15), and Joubert Syndrome (JBTS) (16) while  
149 we noticed that there are disease-specific clinical features, such as the molar tooth sign for JBTS.  
150 We gathered symptoms from all these ciliopathies, collectively labelled as "core ciliopathies", as  
151 a starting point for developing a list of ciliopathy symptoms. As a result, we categorized the most  
152 prevalent ciliopathy symptoms as "core ciliopathy symptoms". It is worth noting that the core  
153 ciliopathy symptoms are only obtained from the primary cilia-related ciliopathies; however, the  
154 list of motile ciliopathies and motile ciliopathy-associated symptoms are gathered and listed in a  
155 separate subgroup on the web page called "Motile Ciliopathy".

156 Furthermore, we noticed that some diseases, such as Birt-Hogg-Dubé syndrome and retinitis  
157 pigmentosa, do not display many core ciliopathy symptoms, but the many protein products  
158 encoded by the disease-causing genes localize to the cilia and cilia-related compartments, whereas  
159 others, such as cone-rod dystrophy, STAR, and SOFT syndromes, have several symptoms that  
160 overlap with core ciliopathies but lack genes encoding proteins that localize to cilia. Categorizing  
161 diseases that do not have core ciliopathy symptoms but have cilia localizing genes poses a bigger  
162 issue in determining whether they should be included in the ciliopathy list. The symptoms of these  
163 diseases might also arise due to the non-ciliary functions of these cilia localizing proteins. The real  
164 question is what criteria should be utilized to categorize ciliopathy diseases. Reiter et al. offered  
165 the following forms of disease classification for ciliopathies: first-order and second-order  
166 ciliopathies (17). Second-order ciliopathies are caused by genes encoding non-cilia localizing  
167 proteins, but displaying cilia-related functions, including building cilia or regulating cilia function.  
168 First-order ciliopathies are diseases caused by genes encoding proteins localizing to cilia and cilia-  
169 related compartments. Even though this review offers an in-depth analysis of both motile and non-  
170 motile ciliopathies, the clinical characteristics of disorders were not taken into consideration.  
171 However, the disease classification should also consider the clinical features of diseases for several  
172 reasons. 1) It is now well known that cilia-localizing proteins have non-ciliary functions, and  
173 various clinical symptoms unrelated to ciliopathy may develop as a result of these genes' non-  
174 ciliary functions. 2) Several disorders contain proteins that localize to cilia, including those that  
175 cause conditions like Cornelia de Lange syndrome (CDLS), whose genes *SMC1A* and *SMC3* do  
176 so (25) To correctly classify them, the symptoms of ciliopathy and CDLS should be compared.  
177 For this reason, the CiliaMiner provides clinical features, subcellular protein localization, and  
178 disease-specific clinical features, and uses heatmaps and interactive tables to display all of this  
179 data. Similar to Reiter et al., we classified ciliopathies using subcellular localization, but disease  
180 classification also takes into account clinical characteristics.

181

182 Based on our classification, the diseases are divided into primary, secondary, and atypical  
183 ciliopathies. The following criteria were used to determine whether a disease is a primary  
184 ciliopathy: 1) comparing disease clinical symptoms to core ciliopathy symptoms; and 2) the  
185 localization of disease-causing gene products in cilia and cilia-related compartments (basal body,  
186 transition zone, and centrosome). Furthermore, if a disease had previously been proposed as a

187 ciliopathy, we included it in the primary ciliopathy disease without considering subcellular  
188 localization evidence. Secondary diseases are documented by independently checking clinical  
189 features and subcellular localization data of condition-associated genes. The disease is listed as a  
190 secondary disease if it presents similarity with core clinical symptoms but lacks a protein localizing  
191 to the cilia and cilia-related compartments, and vice versa. In brief, well-known ciliopathy diseases  
192 and reported ciliopathy disease to fall into the primary ciliopathy while the rest of the diseases are  
193 regarded as secondary diseases if it presents similarity with core clinical symptoms but lacks a  
194 protein localizing to the cilia and cilia-related compartments, and vice versa. Many single gene  
195 disorders have not been classified into any BBS; NPHP or other types of ciliopathies but have been  
196 reported to be atypical ciliopathies, and these atypical ciliopathies are collected directly from  
197 research articles.

198

199 Primary ciliopathy consists of 34 diseases (**Supplementary Table 1**), while secondary disease  
200 includes 18 diseases (**Supplementary Table 2**). Whole diseases are listed in the tables with  
201 disease-associated genes and some clinical features. Bold lettering is used in tables to indicate  
202 ciliary proteins which are localized in the cilia and cilia-related compartments as well as all clinical  
203 symptoms that are common to all diseases when compared to core ciliopathies.

204

205 Atypical ciliopathies were created using the "ciliopathy" keyword search in PubMed between  
206 2018-2022. This subtab shows unclassified ciliopathy genes with their general ciliopathy groups.  
207 The original papers in this subtab report the atypical ciliopathy genes as potential ciliopathy genes.  
208 We downloaded the CiliaCarta (18) gene list and supported it with either ciliary localization or  
209 cilia-related process papers to provide candidate ciliary genes for ciliopathy diseases. This list also  
210 includes additional genes from the "ciliopathy" search from PubMed. We also received a gene list  
211 from this search that localized cilia and related sections, but they are unrelated to ciliopathies. Both  
212 genes are considered potential ciliopathy genes.

213

## 214 **Database implementation**

215

216 CiliaMiner is a novel, user-friendly database that provides an up-to-date list of ciliopathy diseases  
217 and disease genes, as well as detailed clinical symptoms and other disease-related information. R

218 Shiny (v1.7.1) (19) was used to generate the CiliaMiner website. In addition to the Shiny package,  
219 other main libraries like DT (v0.20) (20), ggplot2 (v3.3.5) (21), heatmaply (v1.3.0) (22), and plotly  
220 (v4.10.0) (23) are used for generating visual representations. The DT package is employed for  
221 ordering, searching, and creating data tables in the user interface. ggplot2 is used for creating  
222 graphical representations of the number of ciliopathy genes and their localization presentation on  
223 the home page. Plotly and heatmaply are used for creating interactive figures comprising  
224 interactive heatmaps and data tables.

225

226 Our GitHub repository contains a complete list of the manually curated data along with detailed  
227 excel files for each sub-panel (<https://github.com/thekaplanlab/CiliaMiner>).

228

## 229 **Results**

230

### 231 **Database overview and statistics**

232

233 The last two decades have seen a dramatic expansion of the number of ciliopathies and  
234 ciliopathies-associated genes. Even though all relevant data can be found in multiple databases  
235 and supplementary files, there is an urgent need for a single and comprehensive database for  
236 ciliopathies and ciliopathies-associated genes, so users can access the following: 1. A detailed list  
237 of ciliopathies and potential ciliopathies, including symptoms and gene names 2. The updated list  
238 of the ciliopathy genes and ciliopathy candidate genes. We, therefore, introduce a new ciliopathy  
239 database, called CiliaMiner, which presents a total of 507 genes for different types of ciliopathies  
240 based on our disease classification approach. Users may access the CiliaMiner  
241 at <https://kaplanlab.shinyapps.io/ciliaminer>.

242

243 Primary ciliopathy has a total of 230 genes associated with 34 different ciliopathy diseases. To  
244 assist users, the database includes disease names (also alternative disease names), the names of  
245 disease-associated genes as well as the symptoms of each condition. Furthermore, the subcellular  
246 localization of proteins encoded by disease-causing genes is supplied for each gene, along with  
247 appropriate references, allowing users to view where the products of disease-causing genes are  
248 located in cells. The data obtained demonstrated that the protein products of 72, 52, and 28



249 ciliopathy-related genes, respectively, are found in cilia, the basal body, and the transition zone.  
250 78 ciliopathy encoding proteins do not seem to localize to the cilia-related compartments, but the  
251 subcellular localization of data for these genes are collected from the ProteinAtlas, and these  
252 proteins localize in the different subcellular departments. Some of the proteins are localized in the  
253 plasma membrane (CC2D1A), mitochondria (PAM16, GPX4, XPNPEP3), endoplasmic reticulum  
254 (GANAB, DNAJB11, ALG9, LRAT), Golgi apparatus (LRAT, TXNDC15, PI4KB), and  
255 centrosome (KIAA0753, LRRCC1) (**Figure 2A**) (24). Additionally, some diseases do not have  
256 published genes; just, only the disease condition is known.

257  
258 The secondary disease group has 202 genes belonging to 18 secondary ciliopathy diseases. The  
259 subcellular localization of proteins encoded by disease-causing genes revealed that 12 proteins are  
260 found in the transition zone, 24 in the basal body, and 63 in the cilia; the localization of the rest of  
261 the secondary disease-associated genes are localized in the other subcellular departments like  
262 plasma membrane (PITPNM3, GUCA1A, MERTK, KLHL7, RGR, CNGA1, DHDDS, SLC7A14,  
263 GPC3, SPTBN2, eEF2, TDP1, CC2D1A), mitochondria (IDH3B, HK1, IDH3A, AFG3L2,  
264 COA7), endoplasmic reticulum (PNPLA6, CLCC1, MERTK, REEP6, CACNA1A, ELOVL5,  
265 PLD3), Golgi apparatus (DRAM2) (**Figure 2B**) (24).

266  
267 Motile ciliopathies have three diseases: primary ciliary dyskinesia, Birt-Hogg-Dubé syndrome,  
268 and Juvenile myoclonic epilepsy. This group presents 75 established disease-associated genes for  
269 all. Forty-eight are localized in the cilia, eight are localized in the basal body, and one is found in  
270 the transition zone. Other genes are located in the out of the cilia like plasma membrane  
271 (GABRA1), Golgi apparatus (GOLGA3, TP73, GABRD), cytosol (DNAAF2, SPAG1, CFAP54,  
272 DNAH7, CLCN2). The number of all genes is given in **Figure 2C**.

273  
274 In addition to primary and secondary diseases, all atypical and potential ciliopathy lists are  
275 gathered and presented in the databases. There are 42 genes in the “Atypical Ciliopathy” sub-tab,  
276 of which we present unclassified ciliopathy-associated genes (**Figure 2D**). 274 ciliary proteins  
277 encoding genes were carefully gathered, and a list of these hitherto unconnected to ciliopathy  
278 genes, as well as data on subcellular localization, is presented in CiliaMiner. We consider each of  
279 them as a possible ciliopathy candidate gene. In addition, the list of CilaCarta 934 genes has been

280 included in CiliaMiner for users to examine under the “Potential Ciliary Genes” sub-tab. It is  
281 noteworthy that of these genes, 505 of them localize to cilia and cilia-related compartments.

282

283 Comparing the genes that cause primary, secondary, and atypical ciliopathies demonstrates that  
284 numerous genes are responsible for multiple different diseases. A Venn diagram of the common  
285 and group-specific genes of primary, secondary, and atypical ciliopathies is shown in **Figure 3**.  
286 All ciliopathy subgroups share the gene TTC21B, and both primary and secondary ciliopathies  
287 share the genes IFT140, BBS1, BBS2, ARL6, TTC8, CEP290, IFT172, C8orf37, IFT43, GLI3,  
288 INPP5E, OFD1, SUFU, ARL3, CC2D1A, GUCY2D, RPE65, RPGRIP1, CRX, CRB1, IMPDH1,  
289 RDH12, TULP1, PRPH2, CEP55, CEP83, DCDC2, and DYNC2I2. CFAP45 and PROM1 are  
290 found in both atypical and secondary ciliopathies, whereas TTC26, SCLT1, DNAJB11,  
291 DYNC2LI1, ALMS1, IFT80, and IFT74 are shared between primary and atypical  
292 ciliopathies (**Figure 3**).

293

294 For primary ciliopathy, our collection reveals a total of 2354 distinct clinical features, compared  
295 to 1784 for secondary ciliopathy. Additionally, motile ciliopathy presents 341 clinical symptoms.  
296 We feel that a supplementary table will be outdated if we provide one after some time, so we direct  
297 users to the CiliaMiner website for the regularly updated list. All lists can be downloaded from the  
298 website. The website was created in a way that users may either search for a symptom name to list  
299 diseases where it is present or list all symptoms of a condition. Even for the same condition, distinct  
300 symptoms have been recorded for different genes; as a result, the database includes a screening of  
301 gene-specific symptoms, enabling users to look for gene-specific symptoms.

302

### 303 **User interface and reactivity**

304

305 The CiliaMiner homepage provides two search options. Users can do searches using either a  
306 disease name or a gene name. Gene Search queries can include human gene names, gene IDs, and  
307 Ensembl IDs. On the menu item "Symptoms and Diseases," there is also an option to search by  
308 symptom names. Human gene names, gene IDs, and Ensembl IDs can all be used in Gene Search  
309 queries. Gene names, gene IDs, OMIM numbers, ciliopathy names, and localization references can  
310 all be utilized to do specialized searches across all pages and sub-tabs.

311 CiliaMiner has different visualization tools for the comparative analysis of ciliopathies and clinical  
312 symptoms. Relative heat maps have been integrated into the Ciliopathy Names page. Specifically,  
313 primary ciliopathies and secondary ciliopathies tabs can compare different ciliopathies regarding  
314 clinical symptoms. In addition, heatmaps can be regenerated by user-selected ciliopathies and a  
315 graphical representation of user inputs that can be used for comparing cilia-related clinical  
316 features.

317  
318 The representative figures of symptoms are also another visualization way for summarizing  
319 ciliopathies. This visualization of symptoms was created by using symptom supergroups to  
320 understand ciliopathies' effect on organs and systems in the human body. These 16 supergroups;  
321 aural, neural, ophthalmic, skeletal, respiratory, hormonal, reproductive, facial, cerebral, renal,  
322 coronary and vascular, nasal, liver, cognitive, digestive, and organ anomalies were created for a  
323 straightforward understandable clinical representation by using ciliopathy based clinical  
324 symptoms.

325

### 326 **Strengths of CiliaMiner**

327

328 The continuing increases in the number of ciliopathies and ciliopathy genes present enormous  
329 challenges for clinical and basic scientists. They need to visit multiple databases and look up  
330 specific information. In this regard, CiliaMiner, a novel manually-curated database for ciliopathy,  
331 will be helpful since it makes all ciliopathies, ciliopathy genes, disease- and gene-specific  
332 symptoms, and prospective ciliopathy candidate genes easily accessible. Furthermore, while  
333 providing a thorough list of well-known ciliopathies, CiliaMiner also lists a potential ciliopathy  
334 candidate, such as Cornelia de Lange syndrome. Cornelia de Lange syndrome (CDLS) has seven  
335 disease-associated genes; 2 of them localize (*SMCIA* and *SMC3*) to cilia (25), and 2 of them  
336 (*ANKRD11* and *HDAC8*) are implicated in cilia (26, 27). Although the precise relationship  
337 between CDLS and cilia is not yet understood, localization and functional data suggest that several  
338 symptoms, including hearing loss, abnormal hands and limbs, and cardiac issues, may be brought  
339 on by the cilia-related functions of these genes. Additionally, the network analysis indicates CDLS  
340 disease genes interact with many ciliary genes (**Figure 4**). To establish a connection between cilia  
341 and these genes, more work is required.

342 Researchers that work with model species are crucial to the cilia field, and CiliaMiners makes it  
 343 simple to find the orthologs of genes that cause disorders. The database enables searches for  
 344 mouse, zebrafish, clawed frog, fruit fly, and worm orthologs of human genes linked to diseases.

345  
 346 In conclusion, CiliaMiner is an intuitive database for the exploration of cilia fields, offering a  
 347 detailed list of ciliopathies, ciliopathy genes, clinical characteristics of each illness, and  
 348 prospective ciliopathy candidate genes. The content will be constantly updated and users will be  
 349 able to add and/or correct the relevant information on the website.

350  
 351  
 352  
 353

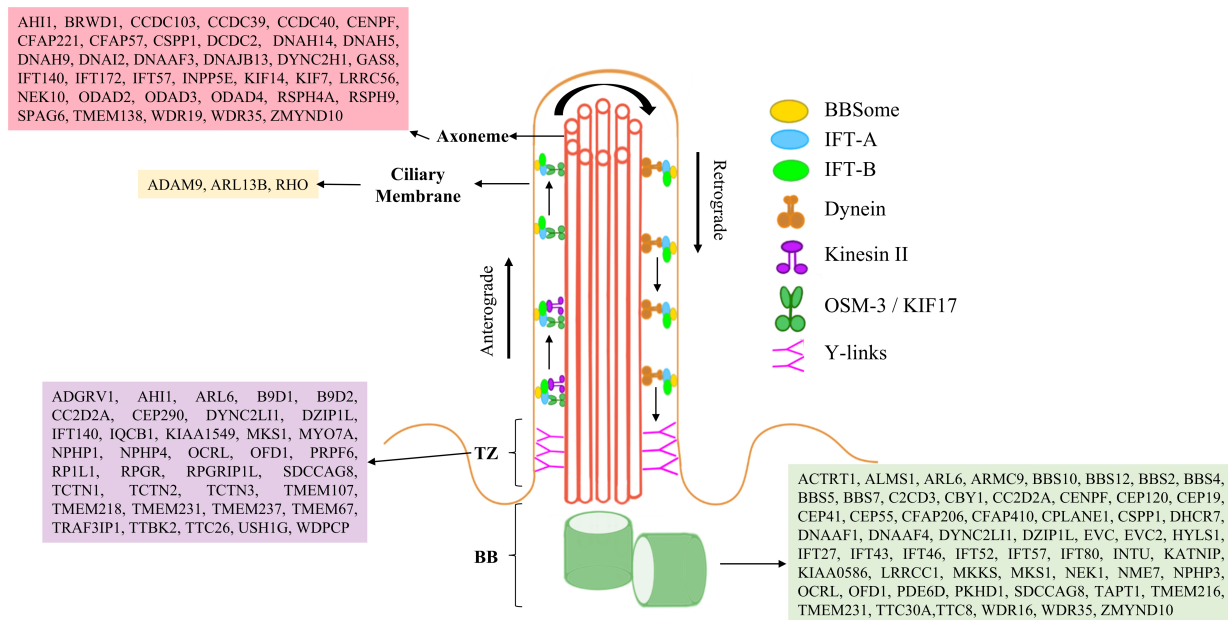

354  
 355 **Figure 1:** The primary cilium is depicted, with a 9 + 0 microtubular axoneme surrounded by a  
 356 ciliary membrane. Two ciliary subcompartments, including the basal body (BB) and transition  
 357 zone (Y-shaped linkers) are shown. The intraflagellar transport (IFT), including motor proteins  
 358 (kinesin and dynein), IFT-A, IFT-B, and Bardet-Biedl syndrome proteins (BBSome) move in both  
 359 directions (anterograde and retrograde). Ciliary localization of proteins encoded by primary and  
 360 secondary ciliopathy-causing genes is shown in a representative cilia structure.

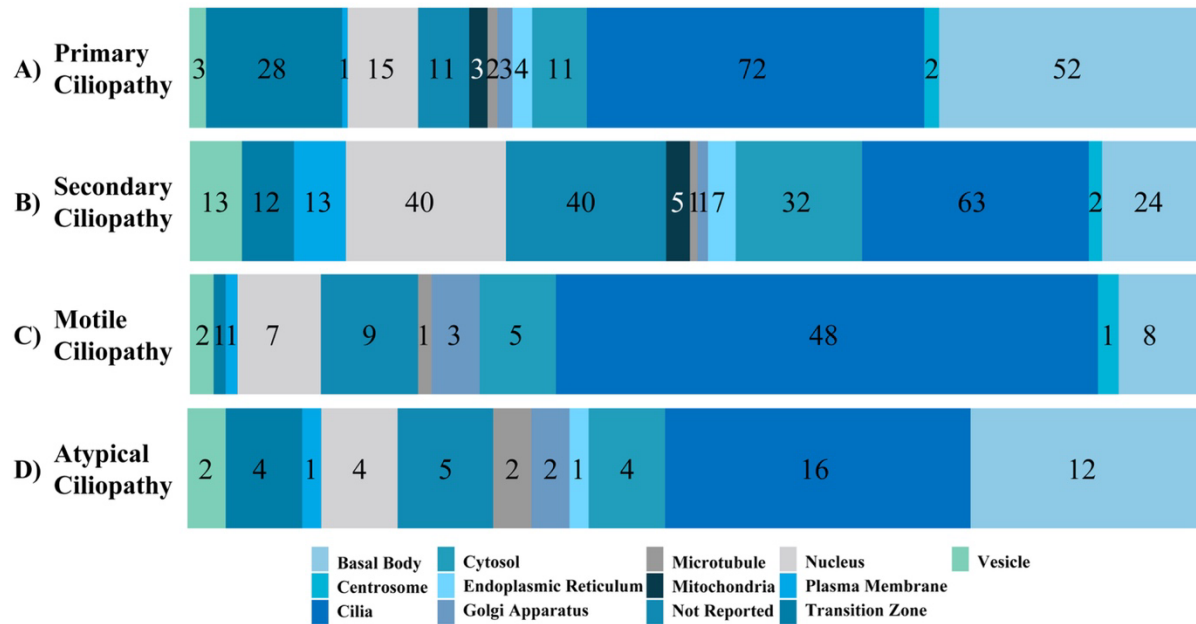

361

362 **Figure 2:** The subcellular localization of ciliopathy disease genes within cells is displayed.

363 Numbers in the bar graph demonstrate how the proteins encoded by the primary, secondary, and

364 atypical ciliopathies-causing genes are localized throughout the cell.

365

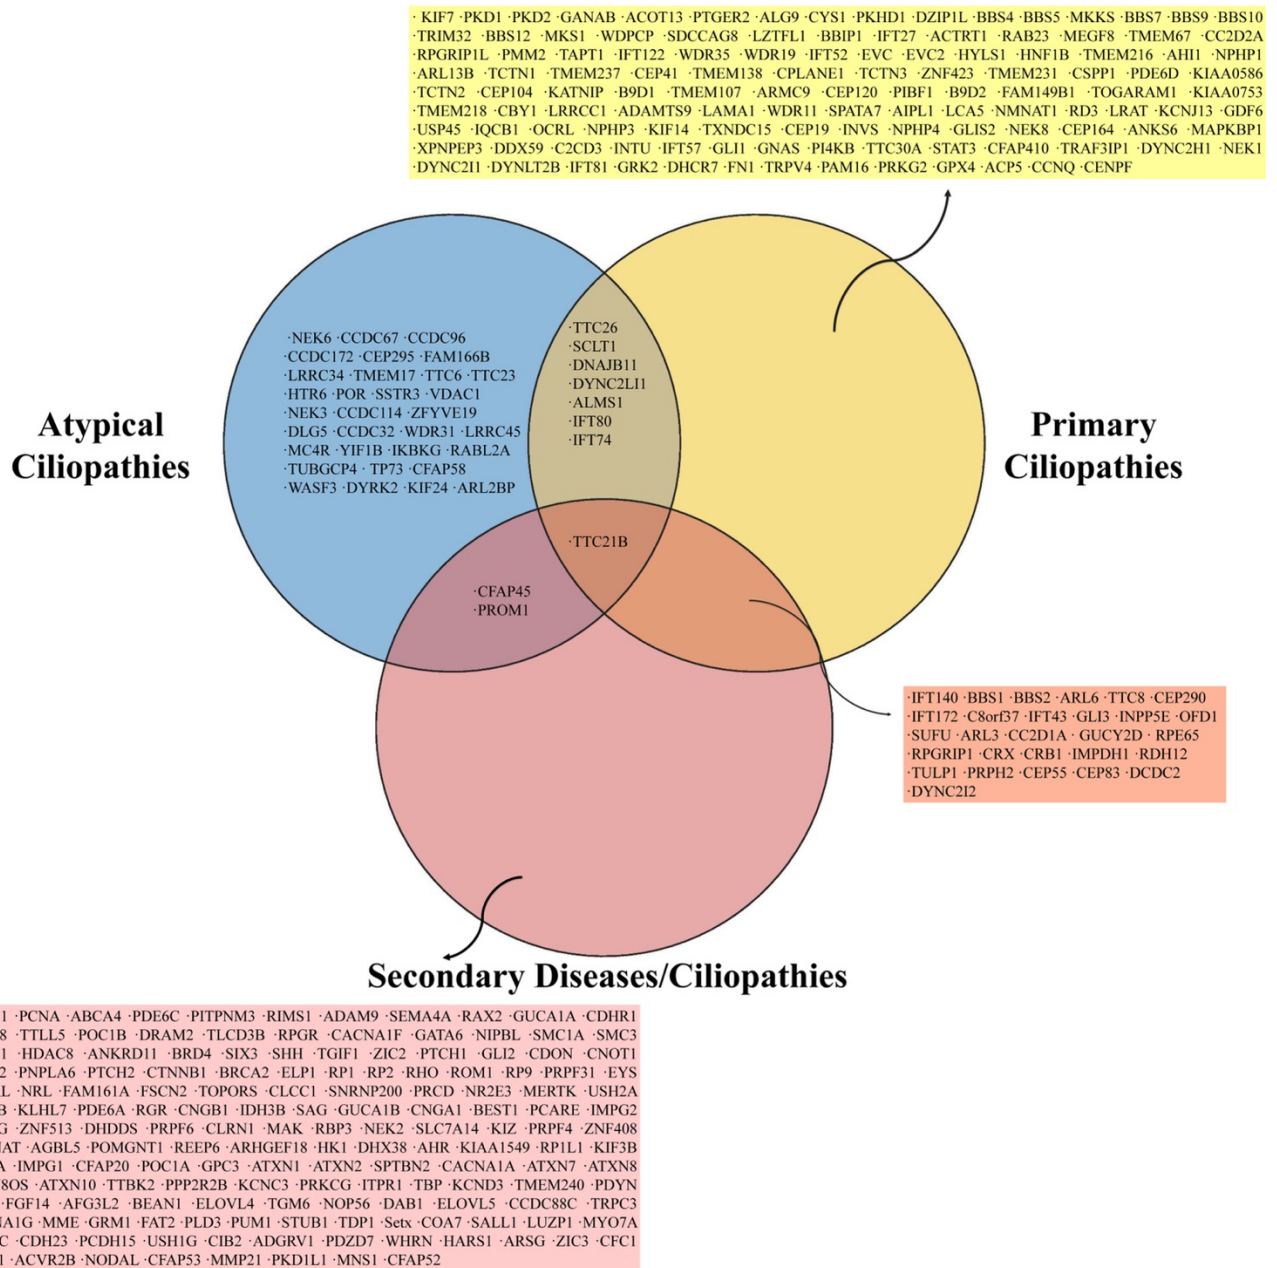

366

367 **Figure 3:** The Venn diagram shows shared genes among ciliopathy-related genes of primary,  
 368 secondary, and atypical ciliopathies.

369



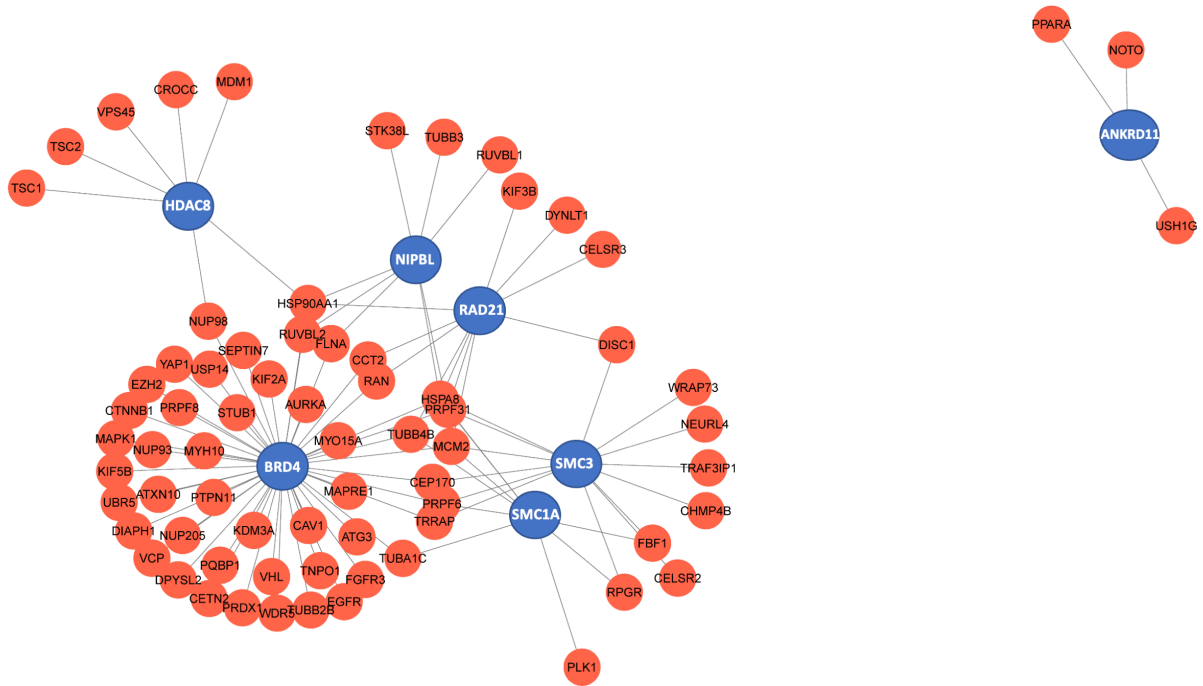

370

371 **Figure 4:** Genes that cause Cornelia de Lange syndrome (CDLS) were analysed using a network.

372 Red represents the ciliary genes while blue points CDLS associated genes.

| Ciliopathy Names       | Clinical Symptoms                                                                                                                                                                                                                                                                                                                                                                                                                                                                                                             | Disease Associated Genes                                                                                                                                                                                                                                                                                                                                 | PubMed ID for Symptoms                                                   |
|------------------------|-------------------------------------------------------------------------------------------------------------------------------------------------------------------------------------------------------------------------------------------------------------------------------------------------------------------------------------------------------------------------------------------------------------------------------------------------------------------------------------------------------------------------------|----------------------------------------------------------------------------------------------------------------------------------------------------------------------------------------------------------------------------------------------------------------------------------------------------------------------------------------------------------|--------------------------------------------------------------------------|
| Bardet–Biedl Syndrome  | Anosmia/hyposmia, Ataxia, Behavioral Problems, Brachydactyly, Cardiac Anomalies/Arrhythmias/Anomalies, Central Nervous System Anomalies, Diabetes Mellitus, Facial Dysmorphism, Growth Deficiency, Hearing Loss, Hormonal Anomalies, Hypertension, Hypogonadism, Impaired Psychomotor Speed and Motor Function, Infertility, Liver Anomalies, Mental Deficiency/Retardation, Obesity, Polydactyly, Renal Anomalies, Reproductive Anomalies, Retinal Degeneration, Short Stature, Syndactyly, Widely Spaced or Irregular Teeth | <b>BBS1, BBS2, ARL6, BBS4, BBS5, MKKS, BBS7, TTC8, BBS9, BBS10, TRIM32, BBS12, MKS1, CEP290, WDPCP, SDCCAG8, LZTFL1, BBIP1, IFT27, IFT172, C8orf37, IFT74, TTC21B, SCLT1</b>                                                                                                                                                                             | 26762677, 19252258                                                       |
| Joubert Syndrome       | Ataxia, Coloboma, Cystic Kidney Dysplasia, Eye Anomalies, Growth Deficiency, Hepatic Developmental Abnormalities, Liver Anomalies, Nephronophthisis, Polydactyly, Respiratory Insufficiency, Widely Spaced or Irregular Teeth                                                                                                                                                                                                                                                                                                 | <b>INPP5E, TMEM216, AHI1, NPHP1, CEP290, TMEM67, RRGRI1, ARL13B, CC2D2A, OFD1, TTC21B, KIF7, TCTN1, TMEM237, CEP41, TMEM138, CPLANE1, TCTN3, ZNF423, TMEM231, CSPP1, PDE6D, KIAA0586, TCTN2, CEP104, KATNIP, B9D1, MKS1, TMEM107, ARMC9, CEP120, SUFU, PIBF1, B9D2, ARL3, FAM149B1, TOGARAM1, KIAA0753, TMEM218, IFT74, CBY1, LRRCC1, ADAMTS9, LAMA1</b> | 5816874, 26092869, 9438658, 16541367                                     |
| Meckel–Gruber Syndrome | Anencephaly, Congenital Heart Defects, Cranial Anomalies, Cystic Kidney Dysplasia, Genital Anomalies, Hepatic Developmental Abnormalities, Hypoplasia, Liver Anomalies, Microcephaly, Nephronophthisis, Occipital Encephalocele, Polydactyly, Renal Anomalies, Situs Inversus                                                                                                                                                                                                                                                 | <b>MKS1, TMEM216, TMEM67, CEP290, RRGRI1, CC2D2A, NPHP3, TCTN2, B9D1, B9D2, TMEM231, KIF14, TMEM107, TMEM218, CEP55, TCTN3, TXNDC15</b>                                                                                                                                                                                                                  | 29479449, 29209597, 7246621, 6859092, 4997715, 6486167, 3130875, 6654326 |
| Nephronophthisis       | Bronchiectasis, Cardiac Anomalies/Arrhythmias/Anomalies, Cerebral Anomalies, Coloboma, Cone-rod Dystrophy, Hypopituitarism, Intellectual Disability, Liver Anomalies, Occipital Encephalocele, Polydactyly, Retinitis Pigmentosa, Situs Inversus, Skeletal Abnormalities                                                                                                                                                                                                                                                      | <b>NPHP1, INVS, NPHP3, NPHP4, GLIS2, NEK8, TMEM67, TTC21B, WDR19, ZNF423, CEP164, ANKS6, CEP83, DCDC2, MAPKBP1, XPNPEP3, CC2D2A, ADAMTS9, SDCCAG8, CEP290</b>                                                                                                                                                                                            | 17513324, 29717526                                                       |

373  
374 **Table 1:** The clinical features and disease-associated genes of selected ciliopathies (non-motile  
375 ciliopathies) are shown in the table. The genes in bold are those that have been reported to localize  
376 to cilia, while the other genes are not.

377  
378 **Supplementary Table 1:** The clinical features and published genes of all primary ciliopathies.  
379 Only the genes shown in bold localize to cilia; all other genes do not. Clinical characteristics  
380 related with ciliopathies are shown in bold.

381



382 **Supplementary Table 2:** The clinical features and established genes of all secondary diseases.  
383 The only genes found to localize to cilia are those in bold. Clinical features associated with  
384 ciliopathies are highlighted (bold).

385

### 386 **Acknowledgments**

387

388 We thank Associate Professor Duygu Sacar for allowing Mehmet Emin Orhan to help this project.  
389 We appreciate Mustafa Pir's assistance with Figure 4. His coding and CilioGenics work enable us  
390 to produce Figure 4. We thank Dr. Abdullah Sezer for critical reading of the manuscript.

391

### 392 **References:**

393

- 394 1. Greenan, G.A., Vale, R.D. and Agard, D.A. (2020) Electron cryotomography of intact motile  
395 cilia defines the basal body to axoneme transition. *J. Cell Biol.*, 219, e201907060.
- 396 2. Ishikawa, T. (2017) Axoneme Structure from Motile Cilia. *Cold Spring Harb. Perspect. Biol.*,  
397 9, a028076.
- 398 3. Lancaster, M.A., Schroth, J. and Gleeson, J.G. (2011) Subcellular spatial regulation of canonical  
399 Wnt signalling at the primary cilium. *Nat. Cell Biol.*, 13, 700–707.
- 400 4. Huangfu, D. and Anderson, K.V. (2005) Cilia and Hedgehog responsiveness in the mouse. *Proc.*  
401 *Natl. Acad. Sci. U. S. A.*, 102, 11325–11330.
- 402 5. Badano, J.L., Mitsuma, N., Beales, P.L., et al. (2006) The ciliopathies: an emerging class of  
403 human genetic disorders. *Annu. Rev. Genomics Hum. Genet.*, 7, 125–148.
- 404 6. Wheway, G., Mitchison, H.M., and Genomics England Research Consortium (2019)  
405 Opportunities and Challenges for Molecular Understanding of Ciliopathies-The 100,000 Genomes  
406 Project. *Front. Genet.*, 10, 127.
- 407 7. Rappaport, N., Twik, M., Plaschkes, I., et al. (2017) MalaCards: an amalgamated human disease  
408 compendium with diverse clinical and genetic annotation and structured search. *Nucleic Acids*  
409 *Res.*, 45, D877–D887.
- 410 8. McKusick, V.A. (2007) Mendelian Inheritance in Man and Its Online Version, OMIM. *Am. J.*  
411 *Hum. Genet.*, 80, 588–604.

- 412 9. Pir, M.S., Bilgin, H.I., Sayici, A., et al. (2022) ConVarT: a search engine for matching human  
413 genetic variants with variants from non-human species. *Nucleic Acids Res.*, 50, D1172–D1178.
- 414 10. Kim, W., Underwood, R.S., Greenwald, I., et al. (2018) OrthoList 2: A New Comparative  
415 Genomic Analysis of Human and *Caenorhabditis elegans* Genes. *Genetics*, 210, 445–461.
- 416 11. Davis, P., Zarowiecki, M., Arnaboldi, V., et al. (2022) WormBase in 2022—data, processes,  
417 and tools for analyzing *Caenorhabditis elegans*. *Genetics*, 220, iyac003.
- 418 12. Thul, P.J., Åkesson, L., Wiking, M., et al. (2017) A subcellular map of the human proteome.  
419 *Science*, 356, eaal3321.
- 420 13. Valente, E.M., Rosti, R.O., Gibbs, E., et al. (2014) Primary cilia in neurodevelopmental  
421 disorders. *Nat. Rev. Neurol.*, 10, 27–36.
- 422 14. Hartill, V., Szymanska, K., Sharif, S.M., et al. (2017) Meckel-Gruber Syndrome: An Update  
423 on Diagnosis, Clinical Management, and Research Advances. *Front. Pediatr.*, 5, 244.
- 424 15. Luo, F. and Tao, Y.-H. (2018) Nephronophthisis: A review of genotype-phenotype correlation.  
425 *Nephrol. Carlton Vic*, 23, 904–911.
- 426 16. Parisi, M.A. (2009) Clinical and molecular features of Joubert syndrome and related disorders.  
427 *Am. J. Med. Genet. C Semin. Med. Genet.*, 151C, 326–340.
- 428 17. Reiter, J.F. and Leroux, M.R. (2017) Genes and molecular pathways underpinning ciliopathies.  
429 *Nat. Rev. Mol. Cell Biol.*, 18, 533–547.
- 430 18. van Dam, T.J.P., Kennedy, J., van der Lee, R., et al. (2019) CiliaCarta: An integrated and  
431 validated compendium of ciliary genes. *PloS One*, 14, e0216705.
- 432 19. Chang, W., Cheng, J., Allaire, J.J., et al. (2022) shiny: Web Application Framework for R.  
433 shiny: Web Application Framework for R (2022).
- 434 20. Xie, Y., Cheng, J., Tan, X., et al. (2022) DT: A Wrapper of the JavaScript Library  
435 “DataTables.” DT: A Wrapper of the JavaScript Library “DataTables” (2022).
- 436 21. Wickham, H. (2016) ggplot2: Elegant Graphics for Data Analysis. *ggplot2: Elegant Graphics*  
437 *for Data Analysis*; Springer-Verlag New York, (2016) .
- 438 22. Galili, T., O’Callaghan, A., Sidi, J., et al. (2018) heatmaply: an R package for creating  
439 interactive cluster heatmaps for online publishing. *Bioinformatics*, 34, 1600–1602.
- 440 23. Inc, P.T. (2015) Collaborative data science. Collaborative data science <https://plot.ly>.
- 441 24. Uhlén, M., Fagerberg, L., Hallström, B.M., et al. (2015) Tissue-based map of the human  
442 proteome. *Science*, 347, 1260419.

- 443 25. Khanna, H., Hurd, T.W., Lillo, C., et al. (2005) RPGR-ORF15, Which Is Mutated in Retinitis  
444 Pigmentosa, Associates with SMC1, SMC3, and Microtubule Transport Proteins. *J. Biol. Chem.*,  
445 280, 33580–33587.
- 446 26. Deardorff, M.A., Bando, M., Nakato, R., et al. (2012) HDAC8 mutations in Cornelia de Lange  
447 syndrome affect the cohesin acetylation cycle. *Nature*, 489, 313–317.
- 448 27. Parenti, I., Gervasini, C., Pozojevic, J., et al. (2016) Broadening of cohesinopathies: exome  
449 sequencing identifies mutations in ANKRD11 in two patients with Cornelia de Lange-overlapping  
450 phenotype. *Clin. Genet.*, 89, 74–81.
